# Supplementary material for: Simple models vs. deep learning in detecting low ejection fraction from the electrocardiogram
Source: PubMed Central journal article supplement (PMC11284011; doi:10.1093/ehjdh/ztae034), 2024-04-25

## Supplemental Tables

### Supplemental Table 1

AUC as independent predictor and LR coefficient for all ECG measurements.

|              | AUC  | Coefficients |
|--------------|------|--------------|
| I_tptparea   | 0.78 | -0.05        |
| I_tarea      | 0.77 | -0.14        |
| I_tamp       | 0.77 | -0.24        |
| aVR_tptparea | 0.77 | 0.05         |
| aVR_tamp     | 0.77 | 0.2          |
| V3_qrsarea   | 0.76 | 0.01         |
| aVR_tarea    | 0.76 | 0.02         |
| meanqtc      | 0.75 | 0.25         |
| V4_qrsdur    | 0.74 | -0.29        |
| V5_qrsdur    | 0.74 | -0.8         |
| meanqrsdur   | 0.74 | -0.33        |
| V3_qrsdur    | 0.73 | 4.45         |
| V6_tptparea  | 0.73 | 0.12         |
| V6_tamp      | 0.73 | -0.18        |
| V4_qrsarea   | 0.73 | 0.21         |
| V6_qrsdur    | 0.72 | -1.59        |
| II_qrsdur    | 0.72 | 1.47         |

|                 |      |       |
|-----------------|------|-------|
| V6_tarea        | 0.72 | 0.08  |
| aVL_tptparea    | 0.72 | 0.27  |
| V2_qrsdur       | 0.72 | 0.54  |
| III_qrsdur      | 0.72 | 0.38  |
| aVL_tarea       | 0.72 | 0.23  |
| aVR_qrsppk      | 0.72 | -0.53 |
| II_ramp         | 0.71 | 0.36  |
| V4_ramp         | 0.71 | 0.86  |
| aVL_tamp        | 0.71 | -0.6  |
| aVF_qrsdur      | 0.71 | 0.31  |
| I_qrsdur        | 0.71 | 0.86  |
| tfrontaxis      | 0.71 | 0.12  |
| aVL_qrsdur      | 0.71 | 0.34  |
| frontmaxangle   | 0.7  | 0.08  |
| aVR_qrsdur      | 0.69 | 0.28  |
| fronttinitangle | 0.69 | 0.06  |
| II_tptparea     | 0.69 | 0.07  |
| I_stend         | 0.69 | 0.19  |
| II_tamp         | 0.69 | 0     |
| aVL_vat         | 0.69 | 0.26  |
| thorizaxis      | 0.69 | 0.04  |
| V2_qrsarea      | 0.69 | 0     |

|                     |      |       |
|---------------------|------|-------|
| II_tarea            | 0.69 | 0.1   |
| V1_qrsdur           | 0.68 | -0.53 |
| V3_ramp             | 0.68 | -0.31 |
| V3_sdur             | 0.68 | -4.87 |
| frontttermangle     | 0.68 | 0.03  |
| V3_rdur             | 0.67 | -4.26 |
| V5_tamp             | 0.67 | -0.11 |
| V5_tptparea         | 0.67 | 0.06  |
| aVR_stend           | 0.67 | 0.66  |
| frontttermmag       | 0.67 | -0.42 |
| V6_stend            | 0.67 | -0.72 |
| V5_ramp             | 0.67 | -1.03 |
| V5_tarea            | 0.67 | -0.04 |
| I_st80              | 0.67 | -0.38 |
| V6_ston             | 0.67 | 0.34  |
| sagqrsmaxmag        | 0.66 | 0.36  |
| aVL_stend           | 0.66 | -2.22 |
| I_vat               | 0.66 | -0.1  |
| I_ston              | 0.66 | -1.16 |
| aVR_ston            | 0.66 | -0.11 |
| I_stmid             | 0.66 | 1.62  |
| frontqrstermma<br>g | 0.65 | 0.26  |

|                  |      |       |
|------------------|------|-------|
| transqrstermma   |      |       |
| g                | 0.65 | -0.08 |
| aVF_qrsarea      | 0.65 | 0.14  |
| fronttmaxmag     | 0.65 | -0.36 |
| V3_vat           | 0.65 | 0.09  |
| II_qrsarea       | 0.65 | -0.16 |
| aVR_tdur         | 0.65 | 1.31  |
| V6_st80          | 0.65 | -0.09 |
| meanrrint        | 0.65 | -0.29 |
| V1_tamp          | 0.65 | 0.21  |
| transqrsinitangl |      |       |
| e                | 0.65 | 0.18  |
| aVL_st80         | 0.65 | 4.06  |
| transqrsmaxan    |      |       |
| gle              | 0.65 | 0.13  |
| aVF_ramp         | 0.65 | -0.96 |
| V1_tptparea      | 0.65 | -0.12 |
| V4_sdur          | 0.65 | 0.4   |
| V6_stmid         | 0.65 | 0.33  |
| I_stslope        | 0.65 | -0.08 |
| sagqrsmaxangl    |      |       |
| e                | 0.64 | 0.07  |
| aVL_stslope      | 0.64 | 0.32  |

|               |      |       |
|---------------|------|-------|
| I_rdur        | 0.64 | -0.65 |
| stfrontaxis   | 0.64 | -0.06 |
| aVR_st80      | 0.64 | -0.45 |
| transqrscwrot | 0.64 | 0.25  |
| V1_tarea      | 0.64 | -0.12 |
| aVL_rdur      | 0.64 | -0.54 |
| sagqrstermmag | 0.63 | -0.04 |
| aVR_tptpdur   | 0.63 | -1.44 |
| aVR_stmid     | 0.63 | -0.22 |
| lowventrate   | 0.63 | -0.6  |
| II_qrspk      | 0.63 | -0.67 |
| meanventrate  | 0.63 | 0.01  |
| aVL_stmid     | 0.63 | -1.43 |
| I_tdur        | 0.63 | 2.54  |
| III_qrsarea   | 0.63 | 0.11  |
| aVL_stdur     | 0.63 | -0.09 |
| V6_rdur       | 0.63 | 1.4   |
| III_stdur     | 0.63 | 0.25  |
| aVF_stdur     | 0.63 | -0.36 |
| V6_stdur      | 0.63 | -0.12 |
| V5_stdur      | 0.63 | -3.98 |
| V1_stdur      | 0.63 | 1.7   |

|                       |      |       |
|-----------------------|------|-------|
| I_stdur               | 0.63 | 0.42  |
| V3_stdur              | 0.63 | 0.97  |
| fronttinitmag         | 0.63 | 0.45  |
| V4_stdur              | 0.63 | 1.41  |
| aVR_stdur             | 0.63 | 0.11  |
| II_stdur              | 0.63 | -0.41 |
| V2_stdur              | 0.63 | -0.09 |
| I_ramp                | 0.63 | -0.32 |
| numberofcompl<br>exes | 0.62 | 0.35  |
| highventrate          | 0.62 | 0.46  |
| II_ston               | 0.62 | -0.57 |
| sthORIZaxis           | 0.62 | -0.01 |
| transtinitangle       | 0.62 | 0.06  |
| V2_rdur               | 0.62 | -0.41 |
| V2_ramp               | 0.62 | -0.01 |
| V5_qrsarea            | 0.62 | 0.23  |
| meanqtseg             | 0.61 | -0.76 |
| ventraterstddev       | 0.61 | -0.27 |
| V1_ston               | 0.61 | -0.24 |
| V3_samp               | 0.61 | 0.3   |
| I_qrspk               | 0.61 | 0.36  |
| II_tdur               | 0.61 | -0.16 |

|                 |      |       |
|-----------------|------|-------|
| II_stend        | 0.61 | 2.1   |
| i40horizaxis    | 0.61 | 0.02  |
| V2_sdur         | 0.61 | -0.19 |
| V5_stend        | 0.61 | 0.5   |
| V6_ramp         | 0.61 | -1.18 |
| sagqrsinitmag   | 0.61 | 0.1   |
| V1_qrsarea      | 0.61 | 0.05  |
| I_tptpdur       | 0.61 | -2.61 |
| sagqrsinitangle | 0.61 | 0.06  |
| III_stslope     | 0.6  | 0.49  |
| sagtmaxmag      | 0.6  | -0.06 |
| V1_ppppdur      | 0.6  | -0.01 |
| aVR_stslope     | 0.6  | 0.02  |
| V6_vat          | 0.6  | 0.02  |
| V5_ston         | 0.6  | -0.91 |
| transpcwrot     | 0.6  | -0.03 |
| aVR_qrsarea     | 0.6  | 0.01  |
| II_tptpdur      | 0.6  | 0.06  |
| sagptermangle   | 0.6  | -0.12 |
| V1_qdur         | 0.6  | 0.57  |
| III_tamp        | 0.6  | -0.07 |
| V6_stslope      | 0.6  | 0.34  |

|                 |      |       |
|-----------------|------|-------|
| V2_vat          | 0.6  | 0.03  |
| V2_pppparea     | 0.6  | 0.04  |
| aVL_ston        | 0.6  | -0.39 |
| III_tptparea    | 0.6  | -0.01 |
| III_tarea       | 0.6  | 0     |
| V4_rdur         | 0.59 | 0.19  |
| V4_samp         | 0.59 | -0.84 |
| V6_tdur         | 0.59 | 0.81  |
| V1_qamp         | 0.59 | -0.03 |
| V3_pppparea     | 0.59 | 0.08  |
| V3_qrspk        | 0.59 | 0.39  |
| transttermmag   | 0.59 | 0.47  |
| III_stend       | 0.59 | -1.79 |
| III_ramp        | 0.59 | -0.05 |
| V4_vat          | 0.59 | 0.04  |
| aVL_qrsarea     | 0.59 | 0     |
| V5_st80         | 0.59 | 0.11  |
| aVF_sdur        | 0.59 | -0.35 |
| V4_pppparea     | 0.59 | -0.03 |
| qtintdispersion | 0.59 | 0.05  |
| III_st80        | 0.59 | 2.41  |
| V5_tdur         | 0.58 | 0.43  |



|                 |      |       |
|-----------------|------|-------|
| V5_sdur         | 0.58 | 0.96  |
| V1_print        | 0.58 | 0.04  |
| V5_stmid        | 0.58 | 0.29  |
| V5_pamp         | 0.58 | -0.08 |
| frontpinitmag   | 0.58 | -0.2  |
| V3_parea        | 0.58 | 0.05  |
| II_sdur         | 0.58 | -1.28 |
| II_st80         | 0.58 | -1.15 |
| V2_qrspk        | 0.58 | 0.23  |
| V4_pamp         | 0.58 | 0     |
| V4_parea        | 0.58 | 0.01  |
| V1_stend        | 0.58 | 0.88  |
| transptermangle | 0.58 | -0.04 |
| frontptermangle | 0.58 | -0.03 |
| V5_qrspk        | 0.58 | 1.21  |
| aVR_samp        | 0.58 | -0.01 |
| V4_tamp         | 0.58 | 0.03  |
| transtmaxangle  | 0.58 | -0.11 |
| transttermangle | 0.58 | -0.01 |
| V4_tptarea      | 0.58 | 0.08  |
| V3_pamp         | 0.58 | -0.1  |
| II_stmid        | 0.58 | -0.25 |

|                         |      |       |
|-------------------------|------|-------|
| aVR_qdur                | 0.58 | -0.48 |
| V3_ston                 | 0.58 | 0.38  |
| V4_tarea                | 0.58 | 0.1   |
| V5_parea                | 0.58 | 0.02  |
| V2_parea                | 0.57 | 0.04  |
| V5_pppparea             | 0.57 | 0.01  |
| V2_pamp                 | 0.57 | -0.11 |
| V2_qdur                 | 0.57 | -0.32 |
| V2_qamp                 | 0.57 | 0.07  |
| aVR_rdur                | 0.57 | -0.33 |
| sagpcwrot               | 0.57 | 0.01  |
| frontqrsterman<br>gle   | 0.57 | -0.03 |
| III_stmid               | 0.57 | -0.07 |
| III_sdur                | 0.57 | -0.25 |
| V1_st80                 | 0.57 | -0.23 |
| avgpcount               | 0.57 | 0     |
| transpinitmag           | 0.57 | -0.13 |
| sagqrsterman<br>gl<br>e | 0.57 | 0.04  |
| II_pamp                 | 0.57 | -0.04 |
| aVF_tptparea            | 0.57 | -0.19 |
| transqrsinitmag         | 0.57 | -0.4  |

|                  |      |       |
|------------------|------|-------|
| aVL_samp         | 0.57 | 0.46  |
| V4_tdur          | 0.57 | -0.49 |
| sagpinitangle    | 0.57 | -0.04 |
| frontpmaxmag     | 0.57 | 0.15  |
| flutterfibcount  | 0.57 | -0.03 |
| aVF_tarea        | 0.57 | -0.12 |
| aVF_tamp         | 0.57 | -0.11 |
| atrialratestddev | 0.57 | 0.03  |
| t40frontaxis     | 0.57 | -0.03 |
| V1_ramp          | 0.57 | 0.19  |
| V6_pamp          | 0.56 | 0     |
| V2_qtint         | 0.56 | 0.09  |
| V1_pppparea      | 0.56 | -0.11 |
| atrialrate       | 0.56 | 0.1   |
| V1_stmid         | 0.56 | -0.16 |
| aVF_ston         | 0.56 | 0.48  |
| V2_ppppdur       | 0.56 | -0.03 |
| V6_tptpdur       | 0.56 | -0.86 |
| V5_tptpdur       | 0.56 | -0.42 |
| V1_samp          | 0.56 | -0.2  |
| I_pppparea       | 0.56 | -0.04 |
| I_parea          | 0.56 | -0.04 |

|                |      |       |
|----------------|------|-------|
| V6_parea       | 0.56 | 0.01  |
| V2_ston        | 0.56 | -0.02 |
| II_prseg       | 0.56 | 0.01  |
| qrsfrontaxis   | 0.56 | 0.08  |
| highprint      | 0.56 | 0.2   |
| frontpmaxangle | 0.56 | -0.01 |
| V6_pppparea    | 0.56 | 0.01  |
| sagqrscwrot    | 0.56 | 0.03  |
| V3_stmid       | 0.56 | -0.54 |
| phorizaxis     | 0.56 | 0.01  |
| V5_stslope     | 0.56 | -0.2  |
| transtcwrot    | 0.56 | 0.05  |
| transpmaxangle | 0.56 | 0.16  |
| aVR_prseg      | 0.56 | 0.01  |
| aVR_pamp       | 0.56 | 0.1   |
| II_print       | 0.56 | 0.07  |
| II_parea       | 0.56 | 0     |
| sagttermmag    | 0.56 | -0.1  |
| II_pppparea    | 0.56 | -0.02 |
| frontpcwrot    | 0.56 | -0.04 |
| V3_qdur        | 0.56 | -5.11 |

|                    |      |       |
|--------------------|------|-------|
| comppausecou<br>nt | 0.56 | 0.1   |
| V3_qamp            | 0.56 | 0.27  |
| aVR_qamp           | 0.56 | -0.16 |
| aVR_parea          | 0.56 | -0.1  |
| sagpmaxangle       | 0.56 | 0.06  |
| V3_st80            | 0.56 | -0.27 |
| aVR_pppparea       | 0.56 | -0.05 |
| I_prseg            | 0.56 | -0.04 |
| aVF_samp           | 0.56 | 0.15  |
| V1_pdur            | 0.55 | 0.04  |
| V1_vat             | 0.55 | -0.09 |
| fronttcwrot        | 0.55 | 0.03  |
| V5_rdur            | 0.55 | 0.6   |
| V6_qrspk           | 0.55 | 1.11  |
| I_samp             | 0.55 | 0.19  |
| III_qtint          | 0.55 | -0.18 |
| V5_samp            | 0.55 | 0.71  |
| II_pdur            | 0.55 | 0.06  |
| aVR_vat            | 0.55 | 0.01  |
| V4_tptpdur         | 0.55 | 0.43  |
| frontptermmag      | 0.55 | -0.13 |
| V3_qtint           | 0.55 | 0.1   |

|                 |      |       |
|-----------------|------|-------|
| transpmaxmag    | 0.55 | 0.29  |
| II_samp         | 0.55 | 0.04  |
| aVF_prseg       | 0.55 | 0.01  |
| aVL_sdur        | 0.55 | -0.47 |
| V3_pdur         | 0.55 | 0.06  |
| aVL_prseg       | 0.55 | 0.11  |
| aVR_sdur        | 0.55 | -0.24 |
| sagpinitmag     | 0.55 | 0.23  |
| aVF_tptpdur     | 0.55 | 0.3   |
| III_print       | 0.55 | -0.04 |
| aVL_print       | 0.55 | -0.1  |
| I_pdur          | 0.55 | 0     |
| aVF_print       | 0.55 | -0.02 |
| V6_qamp         | 0.55 | 0.16  |
| qrshorizaxis    | 0.55 | -0.01 |
| meanqtint       | 0.55 | 0.83  |
| aVF_pamp        | 0.55 | 0.16  |
| frontpinitangle | 0.55 | 0.05  |
| V5_pdur         | 0.54 | -0.1  |
| aVR_pdur        | 0.54 | 0     |
| aVF_stslope     | 0.54 | -0.21 |
| frontqrscwrot   | 0.54 | -0.05 |

|                       |      |       |
|-----------------------|------|-------|
| aVF_parea             | 0.54 | -0.05 |
| frontqrsinitmag       | 0.54 | 0.19  |
| sagptermmag           | 0.54 | 0.29  |
| V3_prseg              | 0.54 | 0.18  |
| aVF_pppparea          | 0.54 | -0.05 |
| aVF_rdur              | 0.54 | -0.28 |
| V6_sdur               | 0.54 | 1.57  |
| V3_stend              | 0.54 | 0.49  |
| aVF_tdur              | 0.54 | -0.32 |
| aVL_qtint             | 0.54 | 0.08  |
| V1_qrspk              | 0.54 | -0.17 |
| V1_rdur               | 0.54 | 0.48  |
| V1_qtint              | 0.54 | 0.06  |
| aVR_print             | 0.54 | 0     |
| V1_tdur               | 0.54 | -0.2  |
| transtmaxmag          | 0.54 | -0.52 |
| V6_prseg              | 0.54 | -0.1  |
| frontqrsinitangl<br>e | 0.54 | -0.1  |
| V6_qdur               | 0.54 | 1.23  |
| V1_rpamp              | 0.54 | 0.21  |
| I_qamp                | 0.54 | 0.17  |
| V1_rpdur              | 0.54 | 0.29  |

|                 |      |       |
|-----------------|------|-------|
| I_sdur          | 0.54 | -0.65 |
| V1_prseg        | 0.54 | 0.05  |
| transpinitangle | 0.54 | 0.09  |
| aVR_ramp        | 0.54 | 0.1   |
| aVR_rpamp       | 0.54 | 0.09  |
| V1_tpamp        | 0.54 | 0.14  |
| III_qrsppk      | 0.54 | 0.57  |
| V6_pdur         | 0.54 | -0.03 |
| I_pamp          | 0.54 | 0.15  |
| V1_tparea       | 0.54 | -0.06 |
| V3_tdur         | 0.54 | -0.49 |
| V1_stslope      | 0.53 | -0.13 |
| V1_tpdur        | 0.53 | -0.1  |
| V4_qtint        | 0.53 | -0.06 |
| t40horizaxis    | 0.53 | -0.09 |
| V4_pdur         | 0.53 | -0.02 |
| V3_print        | 0.53 | -0.15 |
| aVR_rpdur       | 0.53 | -0.22 |
| V5_vat          | 0.53 | 0.01  |
| V1_parea        | 0.53 | 0     |
| V2_print        | 0.53 | 0     |
| V6_samp         | 0.53 | 0.38  |



|                    |      |       |
|--------------------|------|-------|
| V5_prseg           | 0.53 | 0.03  |
| meanprint          | 0.53 | -0.12 |
| V2_samp            | 0.53 | 0.16  |
| III_prseg          | 0.53 | -0.01 |
| V6_print           | 0.53 | 0.04  |
| V5_print           | 0.53 | -0.01 |
| aVF_vat            | 0.53 | 0.04  |
| I_print            | 0.53 | 0.02  |
| II_stslope         | 0.53 | -0.08 |
| V1_pamp            | 0.53 | 0.05  |
| III_samp           | 0.53 | 0.42  |
| aVL_parea          | 0.53 | -0.01 |
| V4_qrsppk          | 0.53 | -0.98 |
| sagpmaxmag         | 0.53 | -0.49 |
| pfrontaxis         | 0.53 | -0.04 |
| aVL_pppparea       | 0.53 | -0.03 |
| V4_qdur            | 0.53 | 0.32  |
| V2_stmid           | 0.53 | 0.08  |
| V4_prseg           | 0.53 | 0     |
| III_tdur           | 0.53 | -0.06 |
| aVF_pdur           | 0.53 | -0.01 |
| transqrsmaxma<br>g | 0.53 | 0.31  |

|             |      |       |
|-------------|------|-------|
| V4_qamp     | 0.53 | -0.7  |
| V3_tptpdur  | 0.53 | 0.42  |
| printstddev | 0.53 | -0.13 |
| V2_st80     | 0.53 | 0.07  |
| V2_tdur     | 0.53 | 1.78  |
| III_vat     | 0.52 | 0.11  |
| aVL_qamp    | 0.52 | 0.53  |
| III_qdur    | 0.52 | -0.44 |
| V4_print    | 0.52 | 0     |
| III_ppppdur | 0.52 | -0.07 |
| III_rpamp   | 0.52 | 0.01  |
| V6_tpdur    | 0.52 | 0.59  |
| aVF_stend   | 0.52 | -1.27 |
| V1_ppamp    | 0.52 | 0.25  |
| V1_pparea   | 0.52 | -0.31 |
| III_rpdur   | 0.52 | -0.36 |
| V5_qtint    | 0.52 | -0.01 |
| aVF_qtint   | 0.52 | 0.07  |
| III_pparea  | 0.52 | 0.07  |
| III_tptpdur | 0.52 | 0.09  |
| aVL_rpdur   | 0.52 | -0.23 |
| aVL_rpamp   | 0.52 | -0.17 |

|               |      |       |
|---------------|------|-------|
| V6_qrsarea    | 0.52 | 0.11  |
| I_tpdur       | 0.52 | 1.88  |
| I_ppppdur     | 0.52 | 0.03  |
| aVL_tdur      | 0.52 | 0.62  |
| I_rpdur       | 0.52 | -0.2  |
| I_rpamp       | 0.52 | -0.02 |
| III_ppamp     | 0.52 | -0.1  |
| V5_tpdur      | 0.52 | 0.24  |
| aVL_pamp      | 0.52 | 0.01  |
| aVR_qtint     | 0.52 | 0.17  |
| I_qdur        | 0.52 | -0.4  |
| sagttermangle | 0.52 | 0     |
| aVL_tptpdur   | 0.52 | -0.71 |
| V3_stslope    | 0.52 | -0.03 |
| aVL_ppppdur   | 0.52 | 0.11  |
| III_pamp      | 0.52 | -0.13 |
| III_qamp      | 0.52 | 0.19  |
| meanprseg     | 0.52 | -0.09 |
| V2_rpdur      | 0.52 | -0.41 |
| V2_rpamp      | 0.52 | 0.07  |
| III_ston      | 0.52 | -0.31 |
| III_rdur      | 0.52 | -0.42 |

|              |      |       |
|--------------|------|-------|
| II_vat       | 0.52 | 0.03  |
| V4_tpdur     | 0.52 | -0.31 |
| V2_tptpdur   | 0.52 | -1.69 |
| V6_ppppdur   | 0.52 | 0     |
| V5_qamp      | 0.51 | 0.5   |
| III_parea    | 0.51 | 0.03  |
| V4_stend     | 0.51 | -0.45 |
| aVF_ppamp    | 0.51 | -0.04 |
| aVR_tpdur    | 0.51 | 0.94  |
| III_pppparea | 0.51 | 0.09  |
| aVF_pparea   | 0.51 | 0.04  |
| I_qrsarea    | 0.51 | 0.13  |
| V1_tptpdur   | 0.51 | 0.02  |
| II_qamp      | 0.51 | 0.08  |
| V2_stend     | 0.51 | -0.16 |
| V3_ppppdur   | 0.51 | 0.01  |
| V2_prseg     | 0.51 | -0.07 |
| notavgpbeats | 0.51 | -0.03 |
| aVF_qdur     | 0.51 | -0.19 |
| V5_qdur      | 0.51 | 0.91  |
| aVF_stmid    | 0.51 | -0.75 |
| V4_stmid     | 0.51 | -0.16 |

|                |      |       |
|----------------|------|-------|
| V6_tpamp       | 0.51 | -0.09 |
| I_qtint        | 0.51 | 0.05  |
| lowprint       | 0.51 | 0.04  |
| V6_tparea      | 0.51 | 0.11  |
| deltawavecount | 0.51 | 0.04  |
| II_tpdur       | 0.51 | -0.15 |
| V6_qtint       | 0.51 | -0.04 |
| V5_ppppdur     | 0.51 | -0.01 |
| aVF_st80       | 0.51 | 1.49  |
| V2_tamp        | 0.51 | 0.16  |
| aVR_ppppdur    | 0.51 | 0     |
| V4_spamp       | 0.51 | -0.06 |
| V4_spdur       | 0.51 | 0.1   |
| V5_rpdur       | 0.51 | 0.2   |
| V5_rpamp       | 0.51 | -0.11 |
| V3_tamp        | 0.51 | 0.08  |
| III_pdur       | 0.51 | 0.07  |
| V4_rpamp       | 0.51 | 0.17  |
| V4_ppppdur     | 0.51 | 0.04  |
| aVR_tpamp      | 0.51 | 0.1   |
| V4_rpdur       | 0.51 | -0.01 |
| transtinitmag  | 0.51 | -0.21 |

|                       |      |       |
|-----------------------|------|-------|
| II_tpamp              | 0.51 | 0.2   |
| II_ppamp              | 0.51 | 0     |
| transqrsterman<br>gle | 0.51 | 0.04  |
| V5_ppamp              | 0.51 | 0.06  |
| V2_stslope            | 0.51 | -0.08 |
| aVL_pdur              | 0.51 | -0.03 |
| V5_spdur              | 0.51 | 0.11  |
| V5_spamp              | 0.51 | 0.04  |
| II_rpdur              | 0.51 | -0.34 |
| II_rpamp              | 0.51 | 0.06  |
| aVF_qrspk             | 0.51 | 0.6   |
| II_spdur              | 0.51 | -0.35 |
| II_spamp              | 0.51 | -0.07 |
| II_tparea             | 0.51 | -0.12 |
| aVR_tparea            | 0.51 | -0.01 |
| V5_pparea             | 0.51 | -0.07 |
| aVL_spdur             | 0.51 | -0.05 |
| aVL_spamp             | 0.51 | 0.02  |
| I_tpamp               | 0.51 | -0.23 |
| I_spdur               | 0.51 | -0.02 |
| II_qdur               | 0.51 | -1.19 |
| I_spamp               | 0.51 | 0.1   |

|                      |      |       |
|----------------------|------|-------|
| V4_stslope           | 0.51 | -0.11 |
| aVF_qamp             | 0.51 | 0.21  |
| V3_tpdur             | 0.51 | -0.32 |
| V3_ppamp             | 0.51 | 0.03  |
| V6_pparea            | 0.51 | -0.03 |
| I_tparea             | 0.51 | 0.17  |
| deltawaveperce<br>nt | 0.51 | -0.1  |
| aVF_tpdur            | 0.51 | -0.22 |
| trigeminycount       | 0.51 | 0.23  |
| trigeminystring      | 0.51 | -0.24 |
| V3_tarea             | 0.51 | -0.09 |
| III_tpdur            | 0.51 | -0.07 |
| aVF_ppppdur          | 0.51 | 0.03  |
| aVF_rpamp            | 0.51 | -0.15 |
| V3_pparea            | 0.51 | -0.07 |
| II_pparea            | 0.51 | -0.01 |
| i40frontaxis         | 0.5  | 0.1   |
| aVF_rpdur            | 0.5  | -0.17 |
| V6_ppamp             | 0.5  | 0     |
| V2_tpdur             | 0.5  | 1.13  |
| V4_st80              | 0.5  | 0.59  |
| V6_rpamp             | 0.5  | -0.24 |

|                |     |       |
|----------------|-----|-------|
| V6_rpdur       | 0.5 | 0.37  |
| III_spdur      | 0.5 | -0.03 |
| I_ppamp        | 0.5 | -0.01 |
| V4_tpamp       | 0.5 | 0.09  |
| III_spamp      | 0.5 | 0     |
| V5_tpamp       | 0.5 | 0.02  |
| V3_tptparea    | 0.5 | -0.1  |
| aVL_qrspk      | 0.5 | 0.61  |
| V3_tparea      | 0.5 | -0.21 |
| bigeminycount  | 0.5 | 0.07  |
| bigeminystring | 0.5 | -0.13 |
| II_qtint       | 0.5 | 0.15  |
| aVL_tpdur      | 0.5 | 0.35  |
| V5_tparea      | 0.5 | -0.1  |
| V4_tparea      | 0.5 | -0.09 |
| aVL_pparea     | 0.5 | 0.07  |
| V2_tparea      | 0.5 | 0.01  |
| aVL_ppamp      | 0.5 | -0.02 |
| V1_spamp       | 0.5 | -0.04 |
| I_pparea       | 0.5 | 0.02  |
| V1_spdur       | 0.5 | 0.05  |
| aVR_pparea     | 0.5 | -0.05 |



|            |     |       |
|------------|-----|-------|
| V3_tpamp   | 0.5 | 0.24  |
| aVF_tparea | 0.5 | 0.03  |
| V2_spamp   | 0.5 | 0.05  |
| V2_spdur   | 0.5 | 0.03  |
| V2_ppamp   | 0.5 | -0.12 |
| V6_spdur   | 0.5 | 0.08  |
| V6_spamp   | 0.5 | -0.14 |
| V2_tpamp   | 0.5 | -0.02 |
| aVL_tpamp  | 0.5 | -0.02 |
| aVF_tpamp  | 0.5 | -0.04 |
| aVL_tparea | 0.5 | -0.09 |
| III_tparea | 0.5 | -0.08 |
| V4_ston    | 0.5 | 0.15  |
| V2_pdur    | 0.5 | -0.03 |
| III_tpamp  | 0.5 | 0.09  |
| aVL_qdur   | 0.5 | -0.2  |
| aVL_ramp   | 0.5 | -0.79 |
| V4_pparea  | 0.5 | 0.03  |
| V3_spamp   | 0.5 | 0.06  |
| V3_spdur   | 0.5 | -0.9  |
| V2_pparea  | 0.5 | 0.09  |
| aVR_spamp  | 0.5 | 0.05  |

|              |     |       |
|--------------|-----|-------|
| aVR_spdur    | 0.5 | -0.09 |
| V1_sdur      | 0.5 | 0.5   |
| aVF_spamp    | 0.5 | -0.03 |
| aVF_spdur    | 0.5 | -0.14 |
| aVR_ppamp    | 0.5 | 0.04  |
| sagtmaxangle | 0.5 | -0.05 |
| II_ppppdur   | 0.5 | -0.03 |
| V2_tarea     | 0.5 | -0.14 |
| V2_tptparea  | 0.5 | -0.15 |
| V3_rpdur     | 0.5 | -2.3  |
| wenckcount   | 0.5 | -0.08 |
| wenckstring  | 0.5 | -0.31 |
| V3_rpamp     | 0.5 | -0.06 |
| II_rdur      | 0.5 | -1.13 |
| V4_ppamp     | 0.5 | -0.04 |

## Supplemental Table 2

Performance of all models across three sites.

|                        | Stanford            | Stanford          | Stanford          | Stanford                        | Stanford            |
|------------------------|---------------------|-------------------|-------------------|---------------------------------|---------------------|
|                        | AUC                 | Sensitivity @ 90% | Specificity @ 90% | Sensitivity @ equal specificity | PPV                 |
| Heart Rate             | 0.63<br>(0.61-0.65) | 0.17 (0.15-0.19)  | 0.18 (0.17-0.18)  | 0.56 (0.53-0.59)                | 0.14<br>(0.13-0.15) |
| V3 Min. QRS Deflection | 0.70<br>(0.68-0.72) | 0.37 (0.34-0.39)  | 0.21 (0.20-0.21)  | 0.66 (0.63-0.69)                | 0.17<br>(0.16-0.18) |
| Mean QTc               | 0.75<br>(0.73-0.77) | 0.39 (0.36-0.42)  | 0.30 (0.29-0.31)  | 0.69 (0.67-0.72)                | 0.20<br>(0.19-0.21) |
| V3 QRS Duration        | 0.75<br>(0.73-0.76) | 0.36 (0.33-0.39)  | 0.29 (0.28-0.30)  | 0.69 (0.66-0.72)                | 0.20<br>(0.19-0.21) |
| aVR T Amplitude        | 0.77<br>(0.75-0.78) | 0.34 (0.31-0.36)  | 0.43 (0.42-0.44)  | 0.72 (0.69-0.74)                | 0.21<br>(0.20-0.23) |
| 5 Variable LR          | 0.86<br>(0.85-0.87) | 0.57 (0.55-0.60)  | 0.66 (0.65-0.67)  | 0.79 (0.76-0.81)                | 0.28<br>(0.27-0.30) |
| 5 Variable XGBoost     | 0.88<br>(0.87-0.89) | 0.59 (0.56-0.62)  | 0.69 (0.68-0.70)  | 0.80 (0.77-0.82)                | 0.29<br>(0.28-0.31) |
| 555 Variable LR        | 0.90<br>(0.89-0.91) | 0.70 (0.68-0.73)  | 0.72 (0.71-0.73)  | 0.82 (0.80-0.84)                | 0.33<br>(0.31-0.35) |
| 555 Variable XGBoost   | 0.92<br>(0.91-0.93) | 0.76 (0.73-0.78)  | 0.79 (0.78-0.80)  | 0.84 (0.82-0.86)                | 0.37<br>(0.35-0.39) |
| AI-ECG                 | 0.94<br>(0.93-0.94) | 0.80 (0.78-0.83)  | 0.82 (0.81-0.83)  | 0.86 (0.84-0.88)                | 0.40<br>(0.38-0.42) |

|                           | UKB                 | UKB                  | UKB                  | UKB                                   | UKB                 |
|---------------------------|---------------------|----------------------|----------------------|---------------------------------------|---------------------|
|                           | AUC                 | Sensitivity @<br>90% | Specificity @<br>90% | Sensitivity @<br>equal<br>specificity | PPV                 |
| Heart Rate                | 0.67<br>(0.61-0.74) | 0.42<br>(0.32-0.52)  | 0.15<br>(0.15-0.15)  | 0.64<br>(0.54-0.73)                   | 0.00<br>(0.00-0.01) |
| V3 Min. QRS<br>Deflection | 0.59<br>(0.52-0.65) | 0.26<br>(0.17-0.35)  | 0.12 (0.11-0.12)     | 0.55<br>(0.45-0.65)                   | 0.00<br>(0.00-0.00) |
| Mean QTc                  | 0.68<br>(0.62-0.75) | 0.38<br>(0.28-0.48)  | 0.13<br>(0.12-0.13)  | 0.64<br>(0.54-0.73)                   | 0.00<br>(0.00-0.01) |
| V3 QRS<br>Duration        | 0.68<br>(0.62-0.74) | 0.38<br>(0.27-0.47)  | 0.16<br>(0.16-0.17)  | 0.62<br>(0.52-0.72)                   | 0.00<br>(0.00-0.01) |
| aVR T<br>Amplitude        | 0.78<br>(0.73-0.83) | 0.49<br>(0.40-0.60)  | 0.38<br>(0.38-0.39)  | 0.71<br>(0.62-0.81)                   | 0.01<br>(0.00-0.01) |
| 5 Variable LR             | 0.83<br>(0.78-0.88) | 0.60<br>(0.51-0.70)  | 0.48<br>(0.47-0.48)  | 0.73<br>(0.62-0.82)                   | 0.01<br>(0.01-0.01) |
| 5 Variable<br>XGBoost     | 0.82<br>(0.77-0.87) | 0.57<br>(0.47-0.67)  | 0.44<br>(0.43-0.44)  | 0.77<br>(0.68-0.85)                   | 0.01<br>(0.01-0.01) |
| 555 Variable<br>LR        |                     |                      |                      |                                       |                     |
| 555 Variable<br>XGBoost   |                     |                      |                      |                                       |                     |
| AI-ECG                    | 0.72<br>(0.67-0.77) | 0.34<br>(0.25-0.45)  | 0.36<br>(0.35-0.36)  | 0.66<br>(0.56-0.75)                   | 0.01<br>(0.00-0.01) |

|                           | Columbia            | Columbia             | Columbia             | Columbia                              | Columbia            |
|---------------------------|---------------------|----------------------|----------------------|---------------------------------------|---------------------|
|                           | AUC                 | Sensitivity @<br>90% | Specificity @<br>90% | Sensitivity @<br>equal<br>specificity | PPV                 |
| Heart Rate                | 0.57<br>(0.57-0.58) | 0.11 (0.10-0.12)     | 0.09<br>(0.09-0.09)  | 0.53<br>(0.52-0.55)                   | 0.15<br>(0.15-0.16) |
| V3 Min. QRS<br>Deflection | 0.64<br>(0.63-0.65) | 0.29<br>(0.28-0.30)  | 0.13<br>(0.12-0.13)  | 0.61<br>(0.59-0.62)                   | 0.18<br>(0.17-0.19) |
| Mean QTc                  | 0.72<br>(0.71-0.73) | 0.35<br>(0.34-0.37)  | 0.26<br>(0.25-0.26)  | 0.66<br>(0.65-0.68)                   | 0.22<br>(0.22-0.23) |
| V3 QRS<br>Duration        | 0.64<br>(0.63-0.65) | 0.27<br>(0.26-0.28)  | 0.18<br>(0.18-0.19)  | 0.56<br>(0.55-0.58)                   | 0.18<br>(0.17-0.18) |
| aVR T<br>Amplitude        | 0.74<br>(0.74-0.75) | 0.28<br>(0.27-0.29)  | 0.39<br>(0.38-0.39)  | 0.69<br>(0.67-0.70)                   | 0.25<br>(0.24-0.26) |
| 5 Variable LR             | 0.80<br>(0.80-0.81) | 0.44<br>(0.42-0.45)  | 0.49<br>(0.49-0.50)  | 0.73<br>(0.72-0.74)                   | 0.28<br>(0.27-0.29) |
| 5 Variable<br>XGBoost     | 0.81<br>(0.80-0.82) | 0.41<br>(0.40-0.43)  | 0.55<br>(0.54-0.55)  | 0.73<br>(0.72-0.75)                   | 0.28<br>(0.28-0.29) |
| 555 Variable<br>LR        |                     |                      |                      |                                       |                     |
| 555 Variable<br>XGBoost   |                     |                      |                      |                                       |                     |
| AI-ECG                    | 0.88<br>(0.87-0.88) | 0.65<br>(0.63-0.66)  | 0.66<br>(0.66-0.67)  | 0.80<br>(0.79-0.81)                   | 0.37<br>(0.36-0.38) |

# Supplemental Figures

## Supplemental Figure 1

Performance of several risk scores in detecting LVSD, by AUROC (area under receiver operator characteristic), specificity at a cutoff providing 90% sensitivity, sensitivity at a cutoff providing 90% sensitivity, sensitivity at a cutoff balancing sensitivity and specificity, and positive predictive value. Error bars are 95% bootstrap confidence intervals.

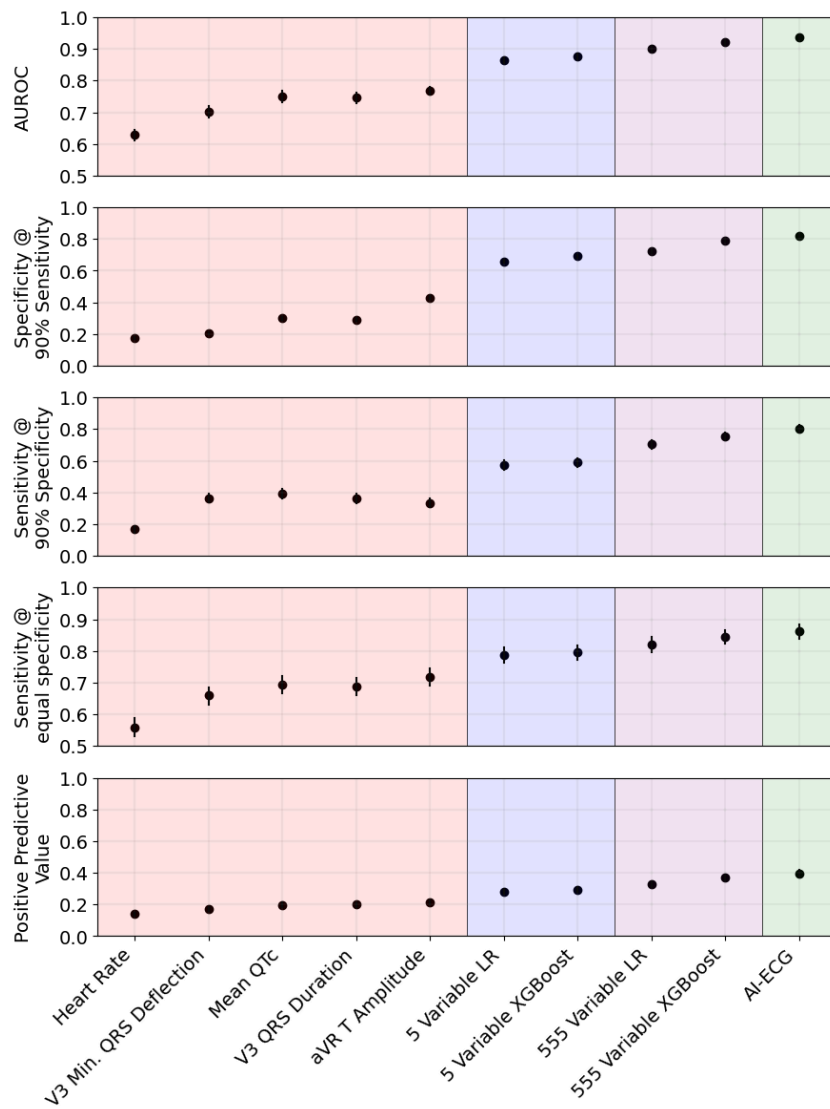

## Supplemental Figure 2

Performance of linear models built on 1 to 8 measurements on the Stanford test set. On the X axis, each tick represents the addition of another variable, i.e. the first tick is a model based only on the aVR T-wave amplitude, the second based on the aVR T-wave amplitude and V3 QRS duration, and so on.

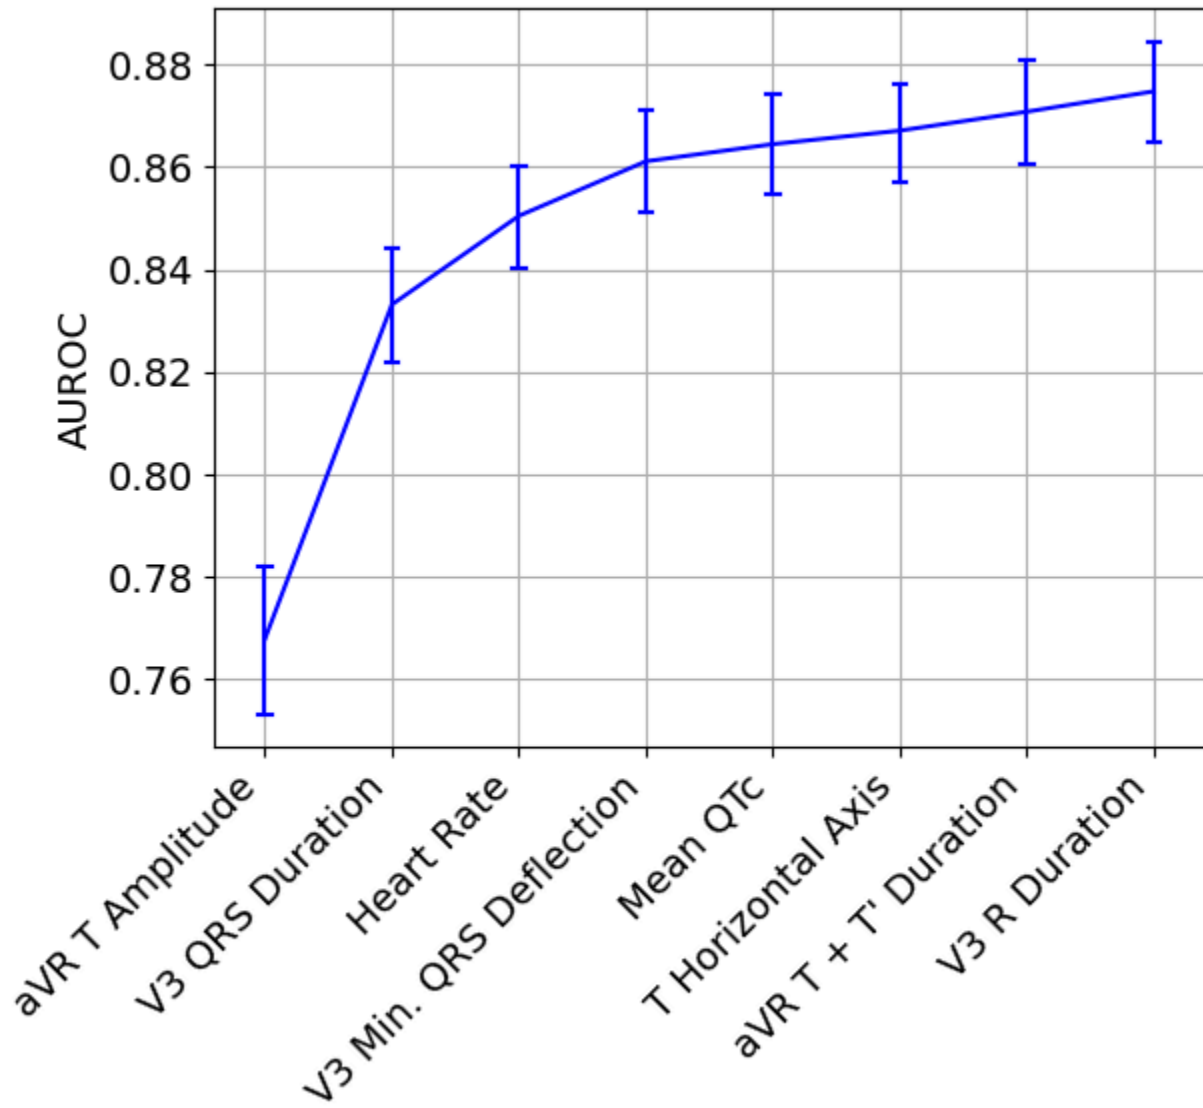

Supplement: ztae034_supplementary_data.pdf [file ztae034_supplementary_data.pdf]
